# Supplementary material
Source: PubMed Central journal article supplement (PMC5913934)
Supplement: AAC.02146-17_zac004186992s1.pdf [file AAC.02146-17_zac004186992s1.pdf]

**Table S1** List of ineffective compounds (FIC  $\geq$  0.5, with 32  $\mu\text{g}/\text{mL}$ ; the compounds labeled with boldface were purchased from Sigma-Aldrich, St. Louis, MO, USA, the remaining compounds were purchased from the National Institute for the Control of Pharmaceutical and Biological Products in Beijing, China.)

| Compound names             |                                     |                        |
|----------------------------|-------------------------------------|------------------------|
| <b>Acacetin</b>            | <b>Dioscin</b>                      | Paclitaxe              |
| <b>Alkannin</b>            | Double coptis                       | Paeoni-lactone         |
| Allimin                    | <b>(-)</b> Epigallocatechin gallate | <b>Paeonol</b>         |
| <b>Aloe-emodin</b>         | <b>Esculine</b>                     | <b>Phillyrin</b>       |
| Alpinetin                  | <b>Eupatilin</b>                    | Phlorizin              |
| <b>Amygdalin</b>           | <b>Formononetin</b>                 | <b>Piperine</b>        |
| <b>Amentoflavone</b>       | <b>Gallic acid</b>                  | <b>Polydatin</b>       |
| <b>Andrographolide</b>     | <b>Gastrodin</b>                    | Potenline              |
| Andrographis Paniculata PE | <b>Geniposide</b>                   | Pueraria lobate        |
| <b>Apigenin</b>            | <b>Genistin</b>                     | <b>Quercetin</b>       |
| <b>Arbutin</b>             | <b>Genkwanin</b>                    | <b>Resveratrol</b>     |
| Arctigenin                 | <b>Gentiopicroside</b>              | Rhoifolin              |
| Arecoline                  | Ginkgetin                           | Rosinated alcohol      |
| <b>Asiatic acid</b>        | <b>Ginkgolide A</b>                 | <b>Rosmarinic acid</b> |
| <b>Astilbin</b>            | <b>Ginsenoside</b>                  | Rotenone               |
| <b>Astragaloside</b>       | Hanfangichin B                      | Rutin                  |
| Astragalus polysaccharide  | Helicid                             | Saikosaponin           |
| <b>Baicalein</b>           | Eupatorium                          | <b>Salidroside</b>     |
| <b>Baicalin</b>            | <b>Icariin</b>                      | Sbsinthin              |
| Belamcandin                | <b>Illicium verum</b>               | <b>Scutellarin</b>     |
| <b>Berberine</b>           | Isoacteoside                        | Semen vaccariae        |
| Bergenin                   | <b>Isoliquiritigenin</b>            | <b>Sennoside A</b>     |
| <b>Brassinolide</b>        | Isoliquiritin                       | <b>Silibinin</b>       |
| <b>Bulleyaconitine A</b>   | Isoalantolactone                    | Sophocarpine           |
| <b>Cantharidin</b>         | Isoflavoues Aglycone                | <b>Sophoricoside</b>   |

|                            |                       |                                      |
|----------------------------|-----------------------|--------------------------------------|
| <b>Chlorogenic acid</b>    | <b>Kaempferide</b>    | <b>Stevioside</b>                    |
| <b>Caffeic acid</b>        | <b>Limonin</b>        | <b>Swertiamarin</b>                  |
| <b>Cepharanthine</b>       | <b>Loganin</b>        | <b>Tectorigenin</b>                  |
| Chrysanthemum yellow acid  | <b>Luteolin</b>       | Tetramethylpyrazine                  |
| <b>Chrysin</b>             | <b>Lycine</b>         | Thymol crystals                      |
| Coixol                     | <b>Maleic acid</b>    | Troloxerutin                         |
| <b>Cordycepin</b>          | <b>Malic acid</b>     | Tubeimoside                          |
| <b>Corilagin</b>           | Menisperine           | <b>Vanillic acid</b>                 |
| Cortex fraxini acetic acid | Momordin Ic           | <b>Verbascoside</b>                  |
| <b>Costunolide</b>         | <b>Myricetin</b>      | Zedoary alcohol                      |
| Crataegolic acid           | Nuciferine            | <b><math>\alpha</math>-asarone</b>   |
| <b>Cyanidin chloride</b>   | Obakunone             | <b><math>\beta</math>-sitosterol</b> |
| Deoxyschizandrin           | OroxylinA             |                                      |
| Diosbulbin B               | <b>Oleanolic Acid</b> |                                      |

---

**Table S2** MIC values for each of the treatments against *Escherichia coli* W3110 (pUC19-*mcr-3*).

| <b>Strain</b>                               | <b>MIC</b><br>pterostilbene<br>( $\mu\text{g/mL}$ ) | <b>MIC</b><br>polymyxin B<br>( $\mu\text{g/mL}$ ) | <b>MIC</b><br>polymyxin B with the combination of<br>pterostilbene (32 $\mu\text{g/mL}$ ) |
|---------------------------------------------|-----------------------------------------------------|---------------------------------------------------|-------------------------------------------------------------------------------------------|
| <i>E. coli</i> W3110 (pUC19- <i>mcr-3</i> ) | 1024                                                | 8                                                 | 1 ( <b>8</b> )                                                                            |

The MICs were determined in triplicate, and the fold change is indicated in parentheses in bold.

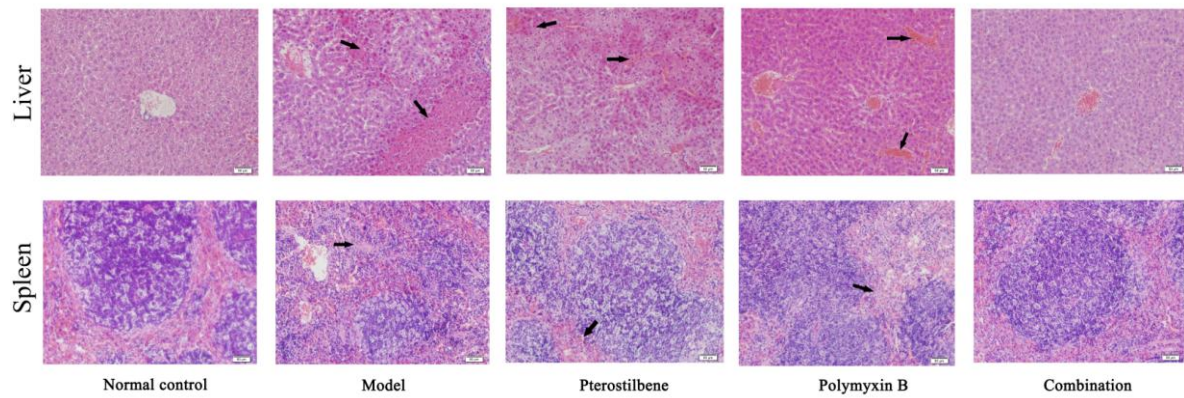

**FIG. S1** Effects of pterostilbene and polymyxin B combination therapy *in vivo*. Histopathology of infected liver and spleen tissues from mice at 24 h post-infection with *E. coli* ZJ478. Significant lesions are marked with black arrows.
